# Supplementary material for: Non-neural phenotype of spinal and bulbar muscular atrophy: results from a large cohort of Italian patients
Source: PubMed Central journal article supplement — J Neurol Neurosurg Psychiatry. 2015 Oct 26;87(8):810–6. doi: 10.1136/jnnp-2015-311305 (PMC4975824; doi:10.1136/jnnp-2015-311305), 2015-10-26
Supplement: jnnp-2015-311305-s1.pdf [file jnnp-2015-311305-s1.pdf]

# Supplementary Figure 1. Categorized scatter plots between pairs of variables.

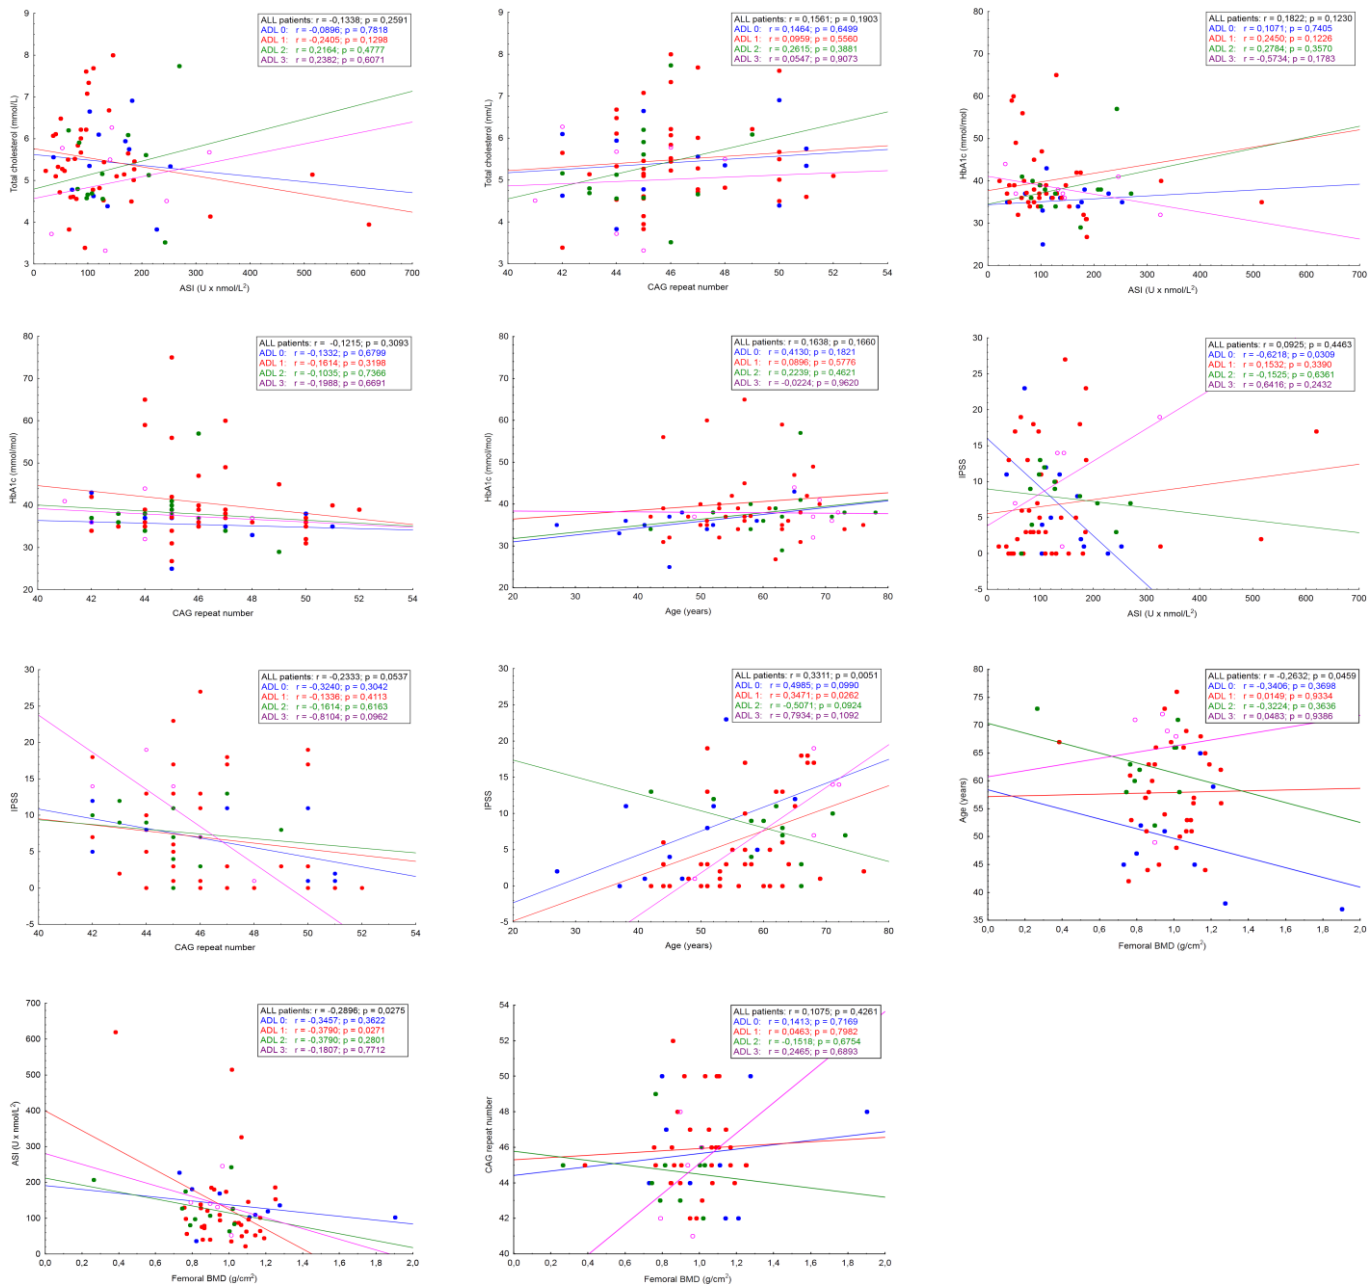

In each plot, value of cumulative and for any ADL grade (grade 0 blue; grade 1 red; grade 2 green; grade 3 purple)  $r$ , together with related significance, is reported. *IPSS*: International Prostate Symptom Score (0-35, indwelling catheter made equal to maximum score for the purposes of correlation); *BMD*: Bone Mass Density of the femur (expressed as Z-score); *HbA1c*: glycated haemoglobin (mmol/mol); *Total cholesterol* expressed as mg/dL; *ASI*: Androgen Sensitivity Index (U x nmol/L<sup>2</sup>).

## Supplementary Figure 2. Correlation matrix of multisystem disease symptom severity scales and biomarkers.

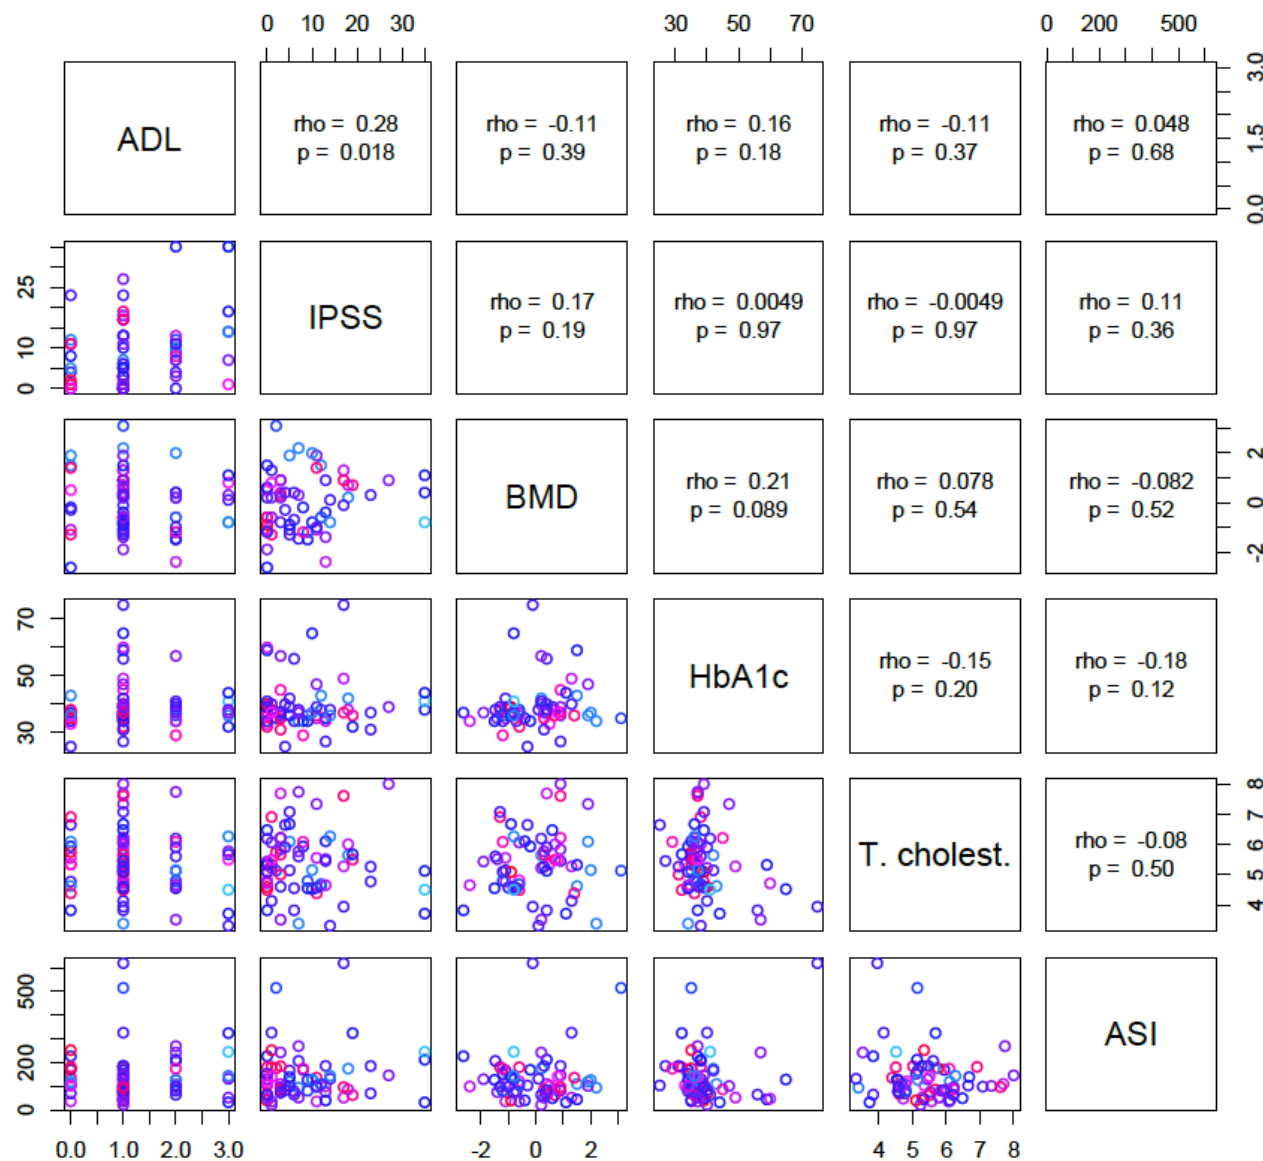

Lower panels show scatter plots with data points color-coded for polyQ repeats (from blue = 41 to red = 52), and upper panels show Spearman Rank correlation parameters ( $\rho$  correlation coefficient and p-value). *IPSS*: International Prostate Symptom Score (0-35, indwelling catheter made equal to maximum score for the purposes of correlation); *BMD*: Bone Mass Density of the femur (expressed as Z-score); *HbA1c*: glycated haemoglobin (mmol/mol); *Total cholesterol* expressed as mg/dL; *ASI*: Androgen Sensitivity Index ( $U \times nmol/L^2$ ).
