# Supplementary material for: Non-neural phenotype of spinal and bulbar muscular atrophy: results from a large cohort of Italian patients
Source: PubMed Central journal article supplement — J Neurol Neurosurg Psychiatry. 2015 Oct 26;87(8):810–6. doi: 10.1136/jnnp-2015-311305 (PMC4975824; doi:10.1136/jnnp-2015-311305), 2015-10-26
Supplement: jnnp-2015-311305-s2.pdf [file jnnp-2015-311305-s2.pdf]

**Supplementary Table 1. Main clinical findings and genitourinary tract evaluation data.**

| Pt | Age (ys) | CAGs (n) | ADL grade | Total IPSS | E | F | I | U | WS | S | N | IIEF | PSA (ug/L) | ASI    | ICS | Prostate volume (cc) | Gynecomstia |
|----|----------|----------|-----------|------------|---|---|---|---|----|---|---|------|------------|--------|-----|----------------------|-------------|
| 1  | 66       | 45       | 2         | 0          | 0 | 0 | 0 | 0 | 0  | 0 | 0 | 3    | 0,53       | 63,95  | -   | -                    | y           |
| 2  | 60       | 48       | 1         | 0          | 0 | 0 | 0 | 0 | 0  | 0 | 0 | 8    | 0,1        | 121,34 | -   | -                    | y           |
| 3  | 56       | 45       | 1         | 0          | 0 | 0 | 0 | 0 | 0  | 0 | 0 | 8    | 0,71       | 153,02 | -   | -                    | y           |
| 4  | 51       | 47       | 1         | 0          | 0 | 0 | 0 | 0 | 0  | 0 | 0 | 9    | 0,42       | 47,82  | -   | -                    | n           |
| 5  | 63       | 44       | 1         | 0          | 0 | 0 | 0 | 0 | 0  | 0 | 0 | 16   | 0,92       | 44,77  | -   | -                    | y           |
| 6  | 53       | 44       | 1         | 0          | 0 | 0 | 0 | 0 | 0  | 0 | 0 | 20   | 0,61       | 49,731 | -   | -                    | y           |
| 7  | 45       | 44       | 0         | 0          | 0 | 0 | 0 | 0 | 0  | 0 | 0 | 21   | 0,8        | 227,08 | -   | -                    | n           |
| 8  | 44       | 52       | 1         | 0          | 0 | 0 | 0 | 0 | 0  | 0 | 0 | 21   | 0,61       | 40,28  | -   | -                    | y           |
| 9  | 61       | 47       | 1         | 0          | 0 | 0 | 0 | 0 | 0  | 0 | 0 | 22   | 0,32       | 109,2  | -   | -                    | y           |
| 10 | 37       | 48       | 0         | 0          | 0 | 0 | 0 | 0 | 0  | 0 | 0 | 22   | 0,28       | 102,73 | -   | -                    | y           |
| 11 | 45       | 50       | 1         | 0          | 0 | 0 | 0 | 0 | 0  | 0 | 0 | 24   | 0,16       | 180,23 | -   | -                    | y           |
| 12 | 50       | 51       | 1         | 0          | 0 | 0 | 0 | 0 | 0  | 0 | 0 | 24   | 0,16       | 68     | -   | -                    | y           |
| 13 | 47       | 50       | 0         | 1          | 0 | 0 | 0 | 0 | 0  | 0 | 1 | 10   | 0,1        | 181,72 | -   | -                    | y           |
| 14 | 49       | 48       | 3         | 1          | 0 | 0 | 1 | 0 | 0  | 0 | 0 | 10   | 0,22       | 140,76 | -   | -                    | n           |
| 15 | 69       | 45       | 1         | 1          | 0 | 0 | 0 | 0 | 0  | 0 | 1 | 15   | 0,29       | 326,19 | -   | -                    | n           |
| 16 | 48       | 46       | 1         | 1          | 0 | 0 | 0 | 0 | 0  | 0 | 1 | 15   | 0,45       | 35,82  | -   | -                    | y           |
| 17 | 41       | 51       | 0         | 1          | 0 | 0 | 0 | 0 | 0  | 1 | 0 | 18   | 0,11       | 252,60 | -   | -                    | n           |
| 18 | 42       | 46       | 1         | 1          | 0 | 0 | 0 | 0 | 0  | 0 | 1 | 24   | 0,55       | 129,74 | -   | -                    | n           |
| 19 | 53       | 46       | 1         | 1          | 0 | 0 | 0 | 0 | 0  | 0 | 1 | d    | 0,9        | 21,72  | -   | -                    | y           |
| 20 | 76       | 43       | 1         | 2          | 0 | 0 | 0 | 0 | 0  | 0 | 2 | 15   | 1,08       | 515,12 | -   | -                    | n           |
| 21 | 27       | 51       | 0         | 2          | 0 | 1 | 0 | 0 | 0  | 0 | 1 | 25   | 0,39       | 176,01 | -   | -                    | y           |
| 22 | 53       | 48       | 1         | 2          | 1 | 0 | 0 | 0 | 0  | 0 | 1 | d    | 0,51       | 56,55  | -   | -                    | y           |
| 23 | 66       | 46       | 2         | 3          | 0 | 0 | 0 | 0 | 0  | 0 | 3 | 0    | 0,5        | 242,72 | -   | -                    | y           |
| 24 | 57       | 49       | 1         | 3          | 0 | 0 | 0 | 1 | 2  | 0 | 0 | 5    | 0,54       | 86,724 | -   | -                    | y           |
| 25 | 54       | 47       | 1         | 3          | 0 | 0 | 0 | 0 | 0  | 1 | 2 | 13   | 0,7        | 110    | -   | -                    | y           |
| 26 | 51       | 46       | 1         | 3          | 0 | 1 | 0 | 0 | 0  | 0 | 2 | 20   | 0,23       | 81,44  | -   | -                    | y           |
| 27 | 50       | 50       | 1         | 3          | 0 | 0 | 0 | 0 | 2  | 0 | 1 | 20   | 0,5        | 86,79  | -   | -                    | y           |
| 28 | 64       | 46       | 1         | 3          | 1 | 0 | 0 | 0 | 0  | 0 | 2 | 21   | 0,17       | 96,56  | -   | -                    | y           |
| 29 | 44       | 50       | 1         | 3          | 0 | 1 | 0 | 0 | 0  | 0 | 2 | 25   | 0,2        | 184,73 | -   | -                    | y           |
| 30 | 58       | 45       | 1         | 3          | 0 | 0 | 1 | 0 | 1  | 0 | 1 | d    | 1,07       | 72,45  | -   | -                    | y           |
| 31 | 58       | 45       | 2         | 4          | 0 | 0 | 0 | 4 | 0  | 0 | 0 | 8    | 1,07       | 83,7   | -   | -                    | y           |
| 32 | 45       | 45       | 0         | 4          | 1 | 1 | 0 | 0 | 0  | 0 | 2 | 24   | 0,47       | 103,37 | -   | -                    | y           |
| 33 | 55       | 45       | 1         | 5          | 2 | 1 | 0 | 0 | 1  | 0 | 1 | 19   | 0,84       | 166,60 | -   | -                    | y           |
| 34 | 57       | 44       | 1         | 5          | 1 | 0 | 0 | 0 | 3  | 0 | 1 | 20   | 0,85       | 138,91 | -   | -                    | y           |
| 35 | 61       | 45       | 1         | 5          | 1 | 0 | 0 | 0 | 4  | 0 | 0 | 23   | 0,43       | 98,55  | -   | -                    | y           |
| 36 | 59       | 42       | 0         | 5          | 0 | 0 | 0 | 0 | 0  | 0 | 5 | d    | 0,19       | 119,7  | -   | -                    | y           |
| 37 | 63       | 45       | 1         | 6          | 0 | 0 | 0 | 0 | 5  | 0 | 1 | 1    | 0,6        | 78,75  | -   | -                    | y           |
| 38 | 44       | 45       | 1         | 6          | 0 | 0 | 0 | 0 | 5  | 0 | 1 | 8    | 0,16       | 65,01  | -   | -                    | n           |
| 39 | 73       | 45       | 2         | 7          | 0 | 0 | 2 | 0 | 4  | 0 | 1 | 2    | 0,89       | 207,1  | -   | -                    | n           |
| 40 | 63       | 46       | 2         | 7          | 0 | 0 | 0 | 0 | 5  | 2 | 0 | 13   | 0,8        | 269,30 | -   | -                    | y           |
| 41 | 73       | 42       | 1         | 7          | 0 | 0 | 0 | 2 | 2  | 0 | 3 | 16   | 1,4        | 94,35  | -   | -                    | y           |
| 42 | 68       | 46       | 3         | 7          | 0 | 0 | 1 | 0 | 5  | 0 | 1 | 17   | 5,31       | 52,36  | -   | -                    | y           |
| 43 | 51       | 44       | 0         | 8          | 3 | 1 | 1 | 0 | 1  | 0 | 1 | 18   | 0,35       | 169,36 | -   | -                    | y           |
| 44 | 63       | 49       | 2         | 8          | 0 | 0 | 0 | 0 | 5  | 2 | 1 | 22   | 0,34       | 174,5  | -   | -                    | y           |
| 45 | 60       | 43       | 2         | 9          | 1 | 2 | 2 | 0 | 3  | 0 | 1 | 15   | 3,79       | 80,88  | -   | -                    | y           |
| 46 | 58       | 44       | 2         | 9          | 0 | 0 | 4 | 0 | 5  | 0 | 0 | 17   | 3,07       | 127,27 | -   | -                    | y           |
| 47 | 71       | 42       | 2         | 10         | 4 | 0 | 0 | 0 | 5  | 0 | 1 | 21   | 1,1        | 126,49 | -   | -                    | y           |
| 48 | 57       | 44       | 1         | 10         | 0 | 0 | 0 | 0 | 5  | 5 | 0 | 24   | 3,97       | 128,51 | -   | -                    | y           |

|    |    |    |   |          |   |   |   |   |   |   |   |    |       |        |              |    |             |
|----|----|----|---|----------|---|---|---|---|---|---|---|----|-------|--------|--------------|----|-------------|
| 49 | 62 | 45 | 2 | 11       | 3 | 0 | 0 | 0 | 5 | 3 | 0 | 22 | 21,62 | 97,47  | -            | -  | y (surgery) |
| 50 | 38 | 50 | 0 | 11       | 2 | 2 | 2 | 0 | 3 | 0 | 2 | 23 | 0,54  | 136,24 | -            | -  | y           |
| 51 | 52 | 47 | 0 | 11       | 1 | 0 | 0 | 5 | 3 | 0 | 2 | 23 | 0,43  | 36,39  | -            | -  | n           |
| 52 | 65 | 46 | 1 | 11       | 0 | 4 | 0 | 0 | 5 | 0 | 2 | 23 | 0,33  | 101,34 | -            | -  | y           |
| 53 | 62 | 45 | 1 | 12       | 1 | 2 | 0 | 1 | 3 | 0 | 5 | 19 | 0,78  | 186,16 | -            | -  | y           |
| 54 | 65 | 42 | 0 | 12       | 0 | 0 | 0 | 0 | 5 | 5 | 2 | 22 | 0,38  | 110,04 | -            | -  | n           |
| 55 | 52 | 43 | 2 | 12       | 2 | 0 | 2 | 0 | 5 | 2 | 1 | 25 | 0,9   | 107,38 | -            | -  | y           |
| 56 | 63 | 44 | 1 | 13       | 3 | 0 | 3 | 2 | 2 | 2 | 1 | 12 | 0,96  | 40,42  | -            | -  | y           |
| 57 | 42 | 47 | 2 | 13       | 1 | 0 | 3 | 0 | 5 | 2 | 2 | 20 | 0,2   | 99,55  | -            | -  | y           |
| 58 | 51 | 46 | 1 | 13       | 3 | 0 | 0 | 3 | 3 | 4 | 0 | 24 | 0,17  | 75,89  | -            | -  | n           |
| 59 | 72 | 45 | 3 | 14       | 0 | 4 | 0 | 3 | 0 | 5 | 2 | 0  | 0,05  | 131,79 | -            | -  | n           |
| 60 | 71 | 42 | 3 | 14       | 3 | 0 | 2 | 0 | 5 | 3 | 1 | d  | 0,9   | 144,16 | -            | -  | y           |
| 61 | 68 | 47 | 1 | 17       | 3 | 0 | 3 | 0 | 5 | 3 | 3 | 14 | 0,38  | 52,36  | -            | -  | y           |
| 62 | 67 | 45 | 1 | 17       | 0 | 3 | 0 | 5 | 5 | 0 | 4 | 17 | 0,21  | 619,39 | -            | -  | y           |
| 63 | 57 | 50 | 1 | 17       | 5 | 0 | 0 | 2 | 5 | 0 | 5 | 23 | 0,11  | 96,76  | -            | -  | y           |
| 64 | 67 | 42 | 1 | 20       | 4 | 2 | 4 | 1 | 4 | 2 | 3 | 0  | 0,25  | 174,45 | equivocal    | 50 | y           |
| 65 | 51 | 50 | 1 | 20       | 5 | 1 | 4 | 0 | 5 | 2 | 3 | 13 | 0,15  | 62,99  | unobstructed | 25 | y           |
| 66 | 66 | 47 | 1 | 20       | 5 | 3 | 5 | 2 | 0 | 2 | 3 | d  | 1,06  | 86,92  | unobstructed | 40 | y           |
| 67 | 54 | 45 | 0 | 22       | 0 | 3 | 5 | 0 | 5 | 5 | 5 | d  | 1,53  | 70,43  | obstructed   | 40 | n           |
| 68 | 66 | 45 | 1 | 23       | 5 | 0 | 3 | 4 | 5 | 3 | 3 | d  | 5,93  | 185,61 | obstructed   | 40 | y (surgery) |
| 69 | 68 | 44 | 3 | 24       | 5 | 4 | 4 | 0 | 5 | 5 | 1 | d  | 1,58  | 324,57 | obstructed   | 25 | n           |
| 70 | 56 | 46 | 1 | 27       | 5 | 5 | 5 | 0 | 5 | 2 | 5 | 21 | 0,29  | 146,27 | obstructed   | 40 | y (surgery) |
| 71 | 69 | 41 | 3 | catheter | - | - | - | - | - | - | - | 0  | 3,75  | 245,49 | -            | -  | n           |
| 72 | 78 | 44 | 2 | catheter | - | - | - | - | - | - | - | 3  | 0,11  | 212,42 | -            | -  | y           |
| 73 | 65 | 44 | 3 | catheter | - | - | - | - | - | - | - | d  | 3,36  | 32,38  | -            | -  | y           |

*Pt*: patients; *ys*: years; *ADL*: activity of daily living scale; *total IPSS*: total International Prostate Symptom Score; *E*: incomplete emptying IPSS item score; *F*: frequency IPSS item score; *I*: intermittency IPSS item score; *U*: urgency IPSS item score; *WS*: weak stream IPSS item score; *N*: nocturia IPSS item score (for each item, score 0: not at all; score 1: less than 1 time in 5; score 2: less than half the time; score 3: about half the time; score 4: more than half the time; 5: almost always); *IIEF*: International Index Erectile Function score; *ASI*: androgen sensitivity index; *ICS*: International Continence Society normogram; *y*: present; *n*: not present; *y (surgery)*: performed surgery for breast reduction; *d*: declined; *catheter*: patient carrying indwelling bladder catheter
